# Supplementary material for: Functional Characterization of a Cucumber (Cucumis sativus L.) Vacuolar Invertase, CsVI1, Involved in Hexose Accumulation and Response to Low Temperature Stress
Source: MDPI journal article supplement (doi:10.3390/ijms22179365), 2021-08-29
Supplement: s1 [file s1]

Supplementary Materials:

**Table S1.** Primers used for PCR amplification and cloning. Included are primers for full length constructs (gateway); partial cDNAs for qPCR (qPCR); for heterologous expression of mature proteins (pPICZ).

| cDNA    | Comment | Primer name | Primer sequence (5'-3')                |
|---------|---------|-------------|----------------------------------------|
| V11     | gateway | V11GW-F     | GGGGACAAGTTTGTACAAAAAAGCAGGCTCCATGGTGA |
|         |         | V11GW-R     | CTTTAATCATTTC                          |
|         | pPICZ   | V11pPICZ-F  | GGGGACCACTTTGTACAAGAAAGCTGGGTCTCAAACTT |
|         |         | V11pPICZ-R  | GCACATCCCATTAAAT                       |
|         | qPCR    | V11-F       | ACCGGGGTACCGTCATGGTGACTTTTAATCAT       |
|         |         | V11-R       | GACTAGGGGCCCAACTTGCACATCCCATTAAAT      |
| tubulin | qPCR    | tubulin-F   | CATTCCCCTTCCCATTGATA                   |
|         |         | tubulin-R   | ATGGCGACCAATAAGCAAAC                   |
|         | qPCR    | tubulin-F   | ACGCTGTTGGTGGTGGTAC                    |
|         |         | tubulin-R   | GAGAGGGGTAAACAGTGAATC                  |

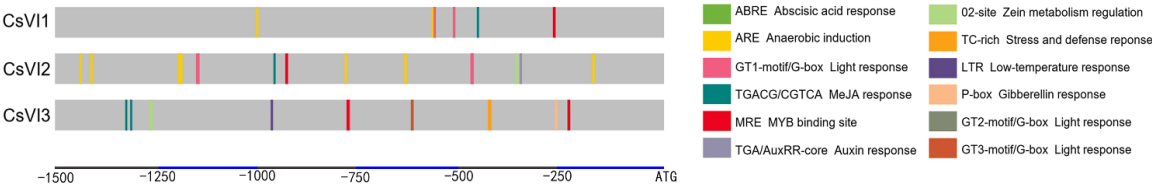

**Figure S1.** *In silico* analysis of cis-regulatory elements in CsVIs promoters. 1.5 kb sequences from upstream of each gene were used to analysis by PlantCARE (<http://bioinformatics.psb.ugent.be/webtools/plantcare/html/>). Stress and phytohormone related cis-regulatory elements are boxed with different colors.

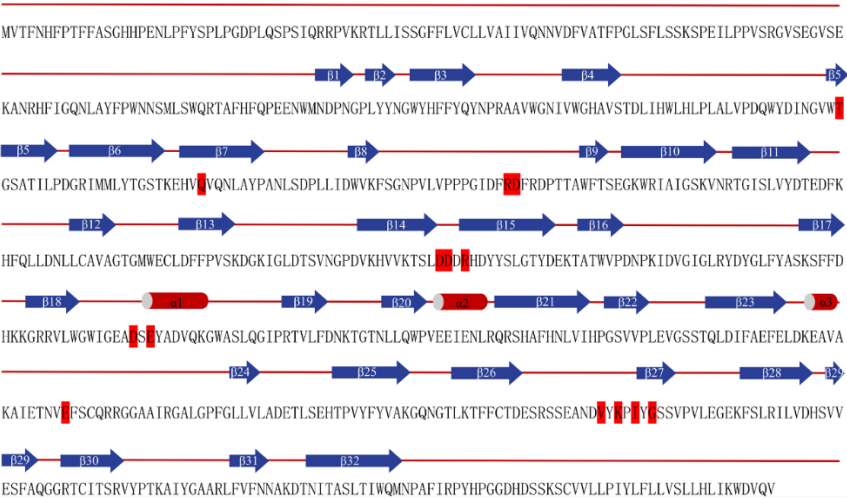

**Fig. S2.** CsV11 interacts with CsINVINH1. Binding sites of amino acids in CsV11 are marked by red.  $\alpha$ -helices and  $\beta$ -sheets are marked with columns and arrows, respectively.
